# Supplementary material for: Alcohol-soluble bis(tpy)thiophenes: new building units for constitutional dynamic conjugated polyelectrolytes
Source: Royal Society of Chemistry journal article supplement (doi:10.1039/c5cp01000d), 2015-01-01
Supplement: c5cp01000d1.pdf [file c5cp01000d1.pdf]

**Electronic supplementary information**

**Alcohol-soluble bis(*tpy*)oligothiophenes: new building units for constitutional dynamic conjugated polyelectrolytes**

**Pavla Bláhová, Jan Svoboda,\* Ivana Šloufová, Jiří Vohlídal\***

*Charles University in Prague, Faculty of Science, Department of Physical and Macromolecular Chemistry, Hlavova 2030, CZ-128 40, Prague 2, Czech Republic.*

Fax: +420 224919752; Tel: +420 221951310;

E-mail:           jan.svoboda@natur.cuni.cz (J. Svoboda)  
                      jiri.vohlidal@natur.cuni.cz (J. Vohlídal)

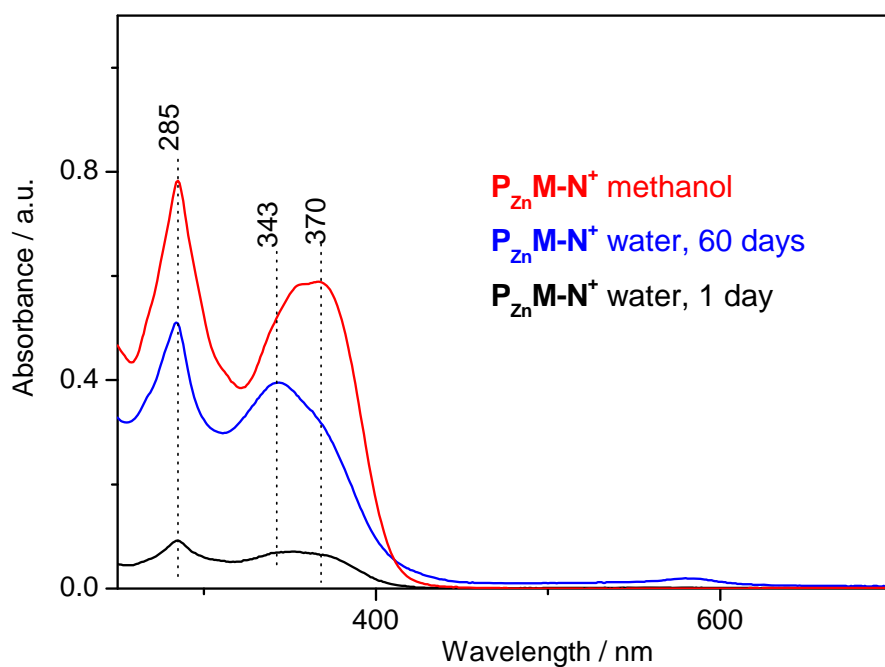

**Figure S1:** Absorption spectra of  $P_{Zn}M-N^+$  in methanol and in water after 1 and 60 days of dissolving.

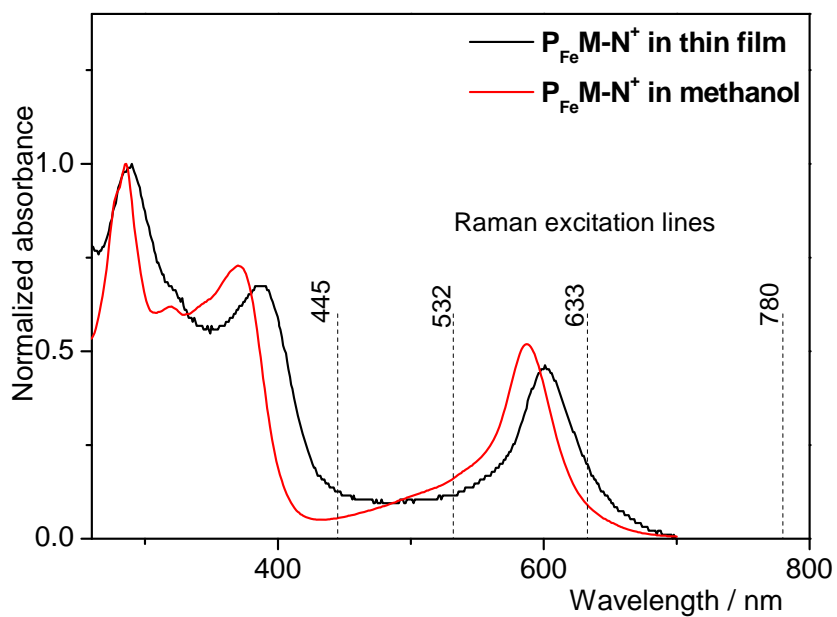

**Figure S2:** Normalized absorption spectra of  $P_{Fe}M-N^+$  in solution and in thin film and position of Raman excitation lines.

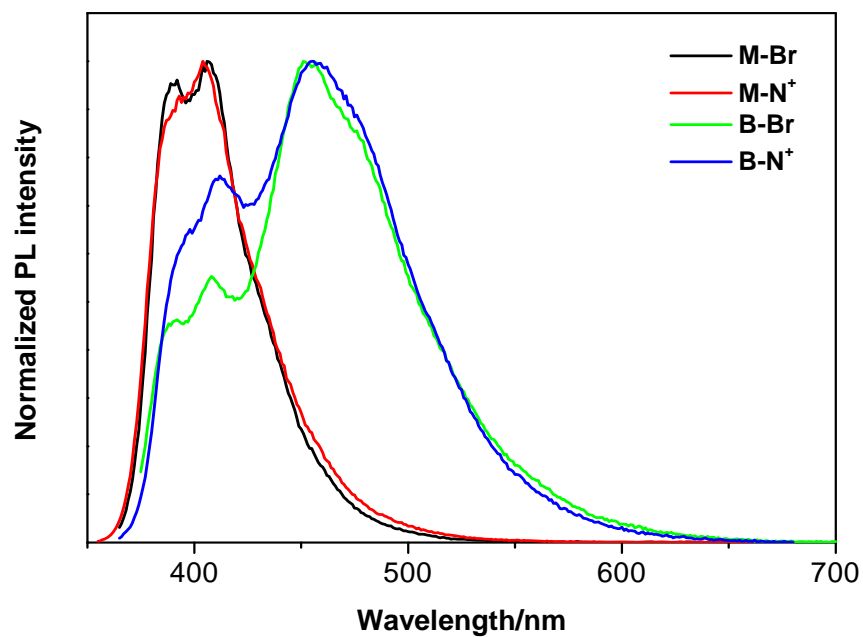

Figure S3: Normalized photoluminescence spectra of unimers in solution.

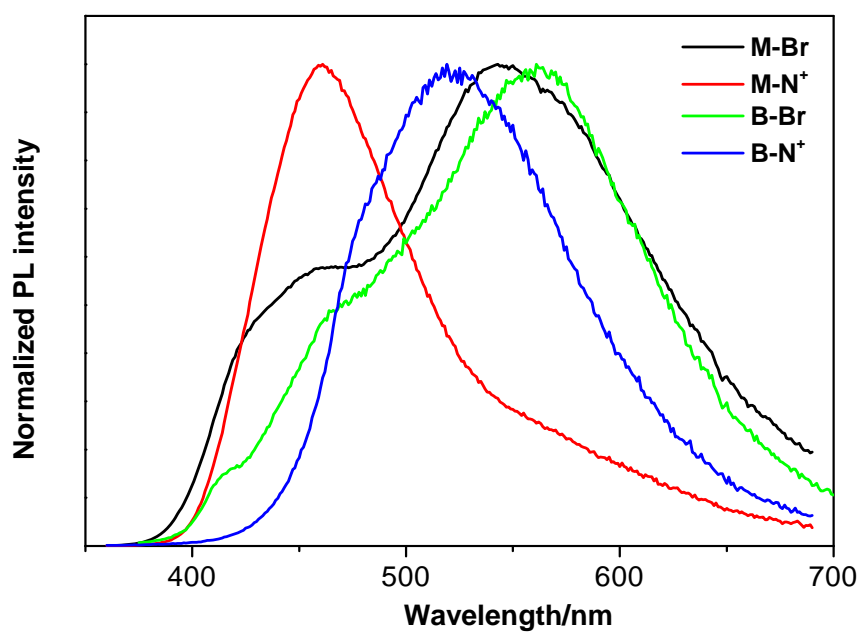

Figure S4: Normalized photoluminescence spectra of unimers in thin film.

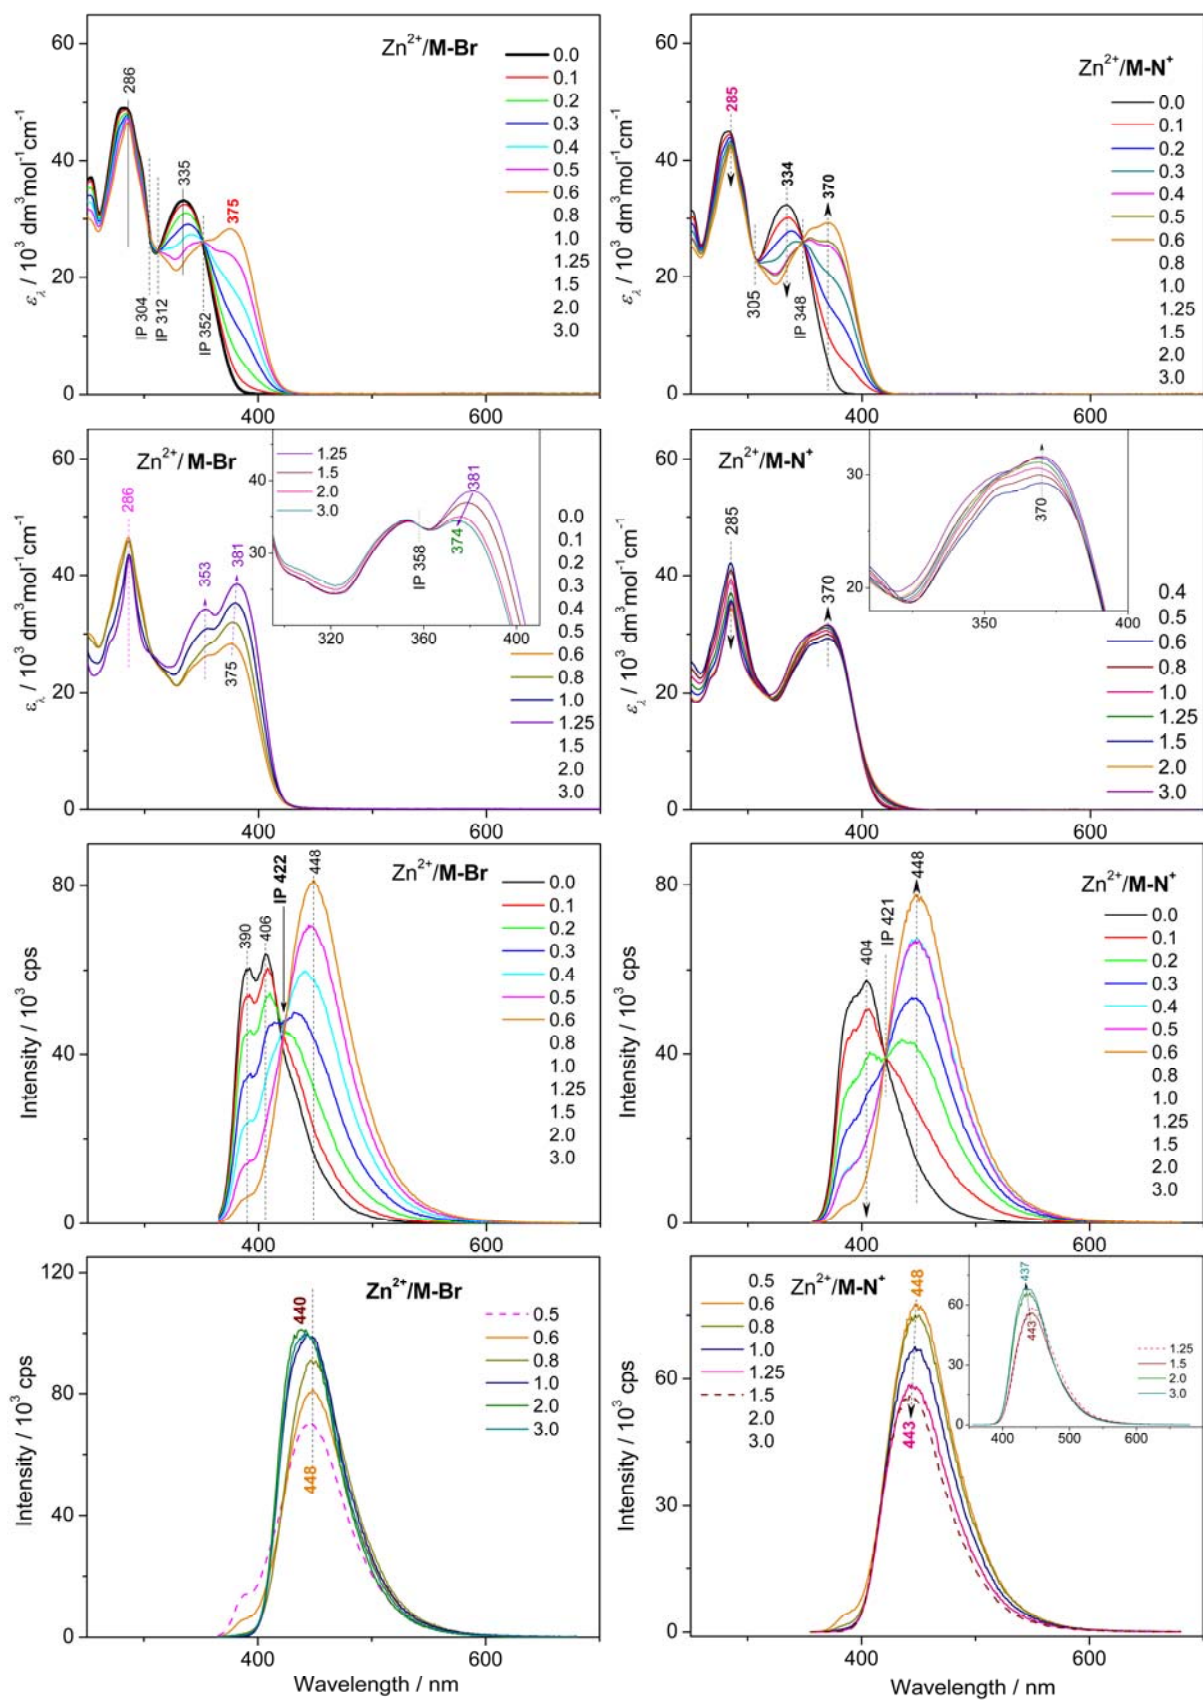

**Figure S5:** Changes in UV/vis and photoluminescence spectra accompanied titrations of **M-Br** (left) and **M-N<sup>+</sup>** (right) unimers with **Zn<sup>2+</sup>** ions. Initial unimer concentration  $2 \cdot 10^{-5}$  mol·dm<sup>-3</sup>; chloroform/acetonitrile (**Br**-unimers), methanol (**N<sup>+</sup>**-unimers), room temperature.

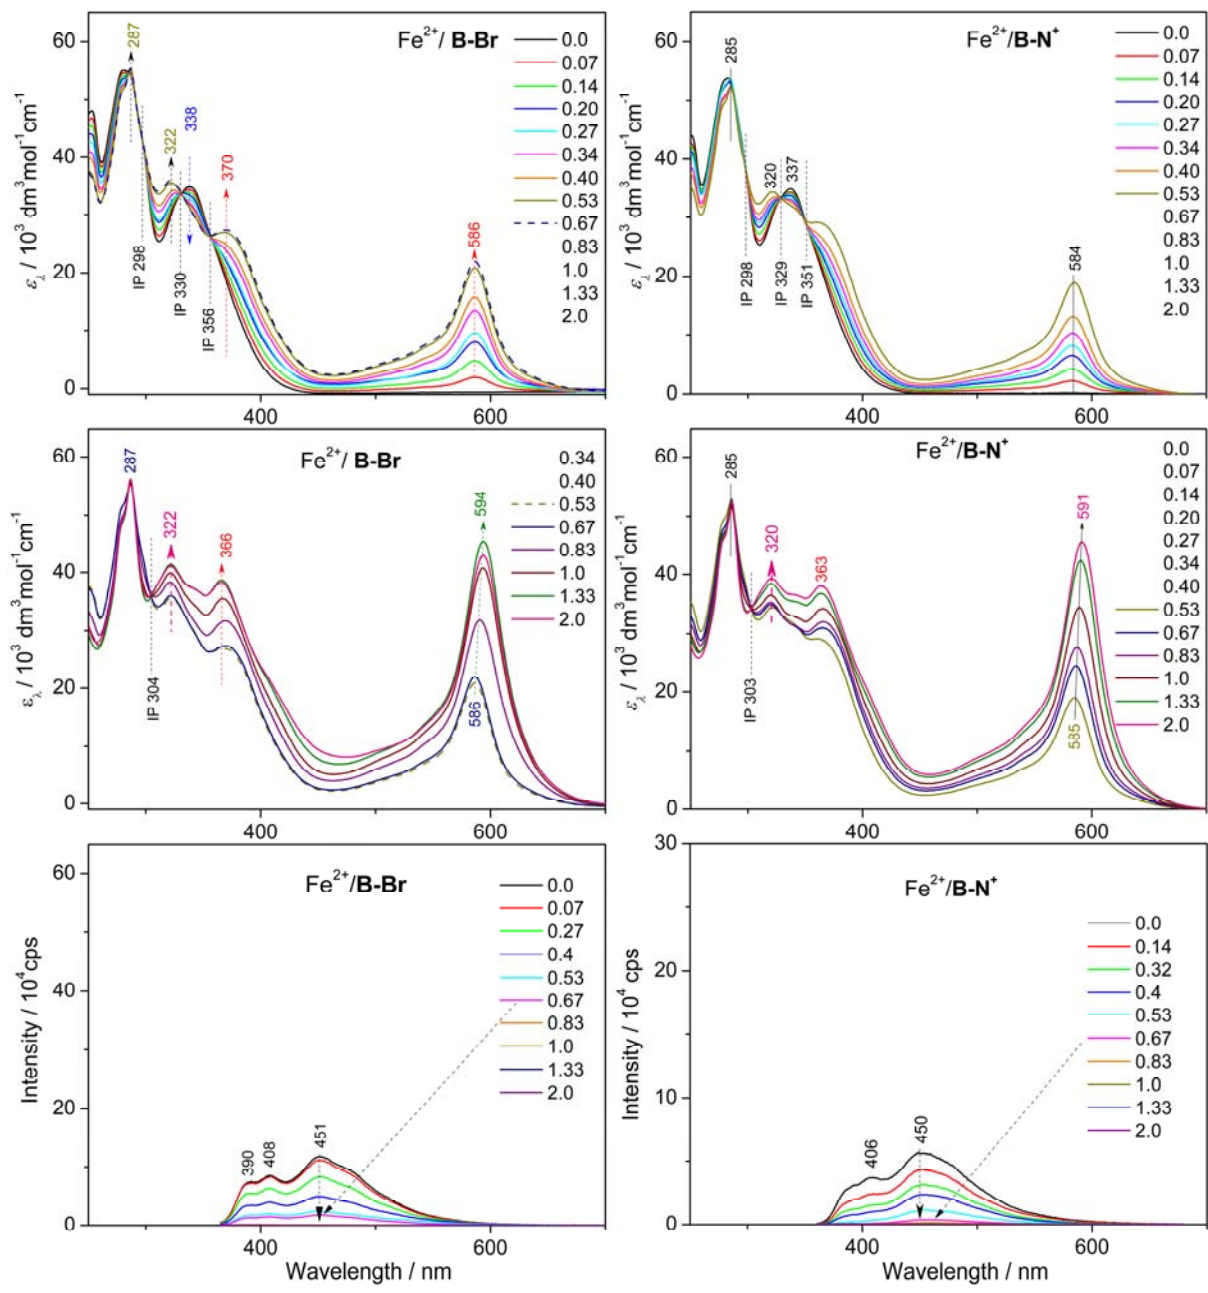

**Figure S6:** Changes in UV/vis and photoluminescence spectra accompanied titrations of **B-Br** (left) and **B-N<sup>+</sup>** (right) unimers with  $\text{Fe}^{2+}$  ions. Initial unimer concentration  $2 \cdot 10^{-5} \text{ mol} \cdot \text{dm}^{-3}$ ; chloroform/acetonitrile (**Br**-unimers), methanol (**N<sup>+</sup>**-unimers), room temperature.

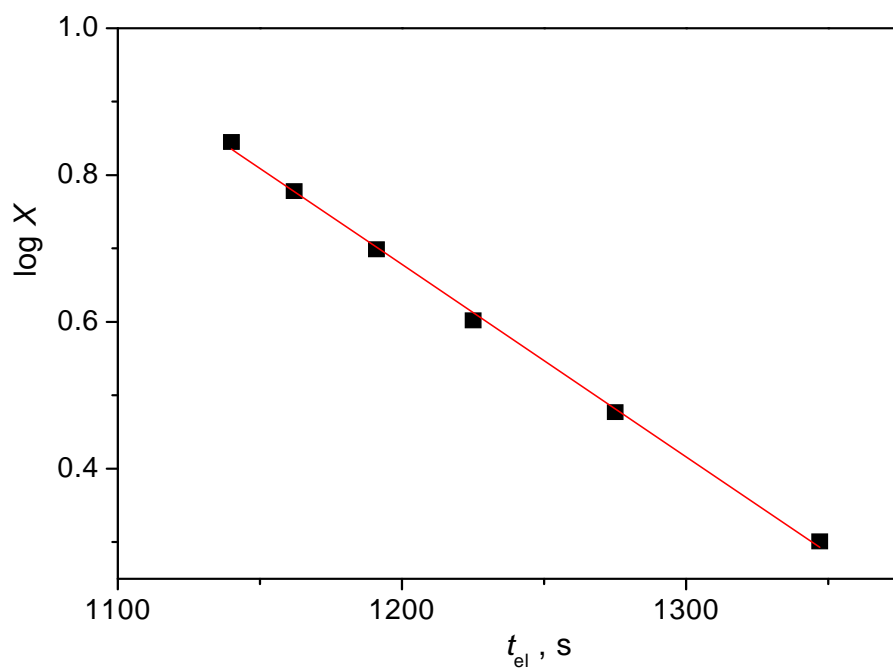

**Figure S7:** Dependence of the degree of polymerization,  $X$ , of **P<sub>Fe</sub>M-Br** on the elution time,  $t_{el}$ .

**Table S1:** The photoluminescence maxima,  $\lambda_F$ , in solution and in thin film, photoluminescence quantum yield,  $\phi$ , and lifetime of excited states,  $\tau$ .

| Sample                               | Luminescence                   |           |             |                          |
|--------------------------------------|--------------------------------|-----------|-------------|--------------------------|
|                                      | $\lambda_F$ , nm ( $\phi$ , %) |           | $\tau$ , ps |                          |
|                                      | solution                       | film      | solution    | film                     |
| <b><i>Unimers</i></b>                |                                |           |             |                          |
| <b>M-Br</b>                          | 406 (3 %)                      | 543 (7 %) | 186 (6%)    | 777 (55%)                |
|                                      |                                |           | 593 (94%)   | 136 (27%)<br>3520 (18%)  |
| <b>M-N<sup>+</sup></b>               | 404 (5 %)                      | 461 (4 %) | 122 (6%)    | 450 (22%)                |
|                                      |                                |           | 581 (6%)    | 1550 (57%)<br>3780 (21%) |
| <b>B-Br</b>                          | 452 (5 %)                      | 561 (3 %) | 428 (20%)   | 1800 (60%)               |
|                                      |                                |           | 51 (71%)    | 426 (16%)                |
|                                      |                                |           | 965 (9%)    | 5050 (24%)               |
| <b>B-N<sup>+</sup></b>               | 450 (5 %)                      | 519 (3 %) | 390 (19%)   | 912 (50%)                |
|                                      |                                |           | 35(71%)     | 218 (32%)                |
|                                      |                                |           | 886 (10%)   | 3280 (18%)               |
| <b><i>Zn-dynamers</i></b>            |                                |           |             |                          |
| <b>P<sub>Zn</sub>M-Br</b>            | 440                            | 460 (1 %) |             | 119 (47%)                |
|                                      |                                |           |             | 542 (42%)                |
|                                      |                                |           |             | 1950 (11%)               |
| <b>P<sub>Zn</sub>M-N<sup>+</sup></b> | 444                            | 473 (4 %) |             | 481 (33%)                |
|                                      |                                |           |             | 82 (54%)                 |
|                                      |                                |           |             | 1660 (13%)               |
| <b>P<sub>Zn</sub>B-Br</b>            | 550                            | 525 (3 %) |             | 866 (54%)                |
|                                      |                                |           |             | 195 (33%)                |
|                                      |                                |           |             | 3380 (13%)               |
| <b>P<sub>Zn</sub>B-N<sup>+</sup></b> | 550                            | 538 (3 %) |             | 192 (55%)                |
|                                      |                                |           |             | 616 (49%)                |
|                                      |                                |           |             | 2310 (6%)                |
